# Supplementary material for: CRISPR/Cas9 Screening for Identification of Genes Required for the Growth of Ovarian Clear Cell Carcinoma Cells
Source: MDPI journal article supplement (doi:10.3390/cimb44040108), 2022-04-07
Supplement: s1 [file s1]

**Supplementary Table S1** List of RT-qPCR primers used in this study

| Name  | Forward                | Reverse                 |
|-------|------------------------|-------------------------|
| GAPDH | GCACCGTCAAGGCTGAGAAC   | TGGTGAAGACGCCAGTGGA     |
| PAIP1 | CGGGGCTGGTGATCCATACTT  | TCGCTTACGCTCTGATTCCAAAC |
| KDM2A | AAGAGCAGAATCTCCGTGTTGC | AGAAACCACTCCAGGGCTGC    |
